# Supplementary material
Source: Elsevier journal article supplement (https://www.sciencedirect.com/science/article/pii/S0300289620302544)
Supplement: mmc2 [file S0300289620302544:mmc2.pdf]

## **Impact of an improvised system on preserving oxygen supplies in patients with COVID-19.**

### **Supplementary files**

### **Methods**

This pre-post intervention study was conducted in the Cliniques universitaires Saint-Luc, Brussels, Belgium.

#### ***Material***

The Double-Trunk Mask (DTM) is made up of a regular aerosol mask (Sidestream, Philips Respironics, New Jersey, USA) with two corrugated tubes (ISO 22) or “trunks”, 15 cm in length, inserted in the exhalation ports (e-Fig 1). This system is applied on the face of the patient, above the nasal cannula used for the delivery of oxygen therapy. By means of the tubing and the collector of the nebulizer, the DTM sequesters the amount of oxygen that is wasted during expiratory phases and restitutes it on subsequent inspiratory phases. Therefore, for a similar oxygen output, the DTM acts as a booster of the fraction of inspired oxygen.

#### ***Study design***

Oxygen flow requirements determined the baseline oxygen delivery system. Nasal cannulas were applied for flows up to 6 L/min, simple facemasks (oronasal masks) for oxygen flows between 7 and 10 L/min, and non-rebreathing masks (NRM) for flows between 11 and 15L/min. In circumstances where SpO<sub>2</sub> jumped from less than 92% with the oronasal mask at 10L/min to more than 96% with the NRM, one of the two one-way valves at the exhalation ports was removed in order to achieve the desired baseline target SpO<sub>2</sub> value.

#### ***Outcomes***

Arterial blood gases, vital parameters ( $\text{SpO}_2$ , respiratory rate, heart rate, arterial blood pressure, temperature) and oxygen output were measured at baseline ( $T_0$ ) and at the end of the 30-min period under the DTM ( $T_{30}$ ). Blood gas sampling was performed by medical staff not involved in this study and analysed using the ABL90 FLEX blood gas analyser (Radiometer, Denmark). Vital parameters and oxygen output were measured again 30 minutes after the DTM was withdrawn ( $T_{60}$ ).

At  $T_{30}$  and  $T_{60}$ , the patients were asked to note the comfort-discomfort level and preference using a 5-point Likert scale ranging from “strongly disagree” to “strongly agree”. Questions were as follows: 1. “Is the oxygen delivering system comfortable?”, 2. “is the oxygen delivering system more comfortable than the previous one?”, 3. “is the oxygen delivering system inconvenient leading to a risk of its removal?”.

Results of computed tomography (CT) performed at hospital admission as part of routine evaluation of patients suspected of COVID-19 were reviewed in patient medical records. The severity of pulmonary involvement was classified using the recent consensus statement on reporting of chest CT findings related to COVID-19<sup>1</sup>.

### ***Statistical analysis***

The primary outcome was the change in oxygen flow generated by using the DTM. Assuming an  $\alpha$  risk of .05 and a power of 90% in a two-sided test, a sample size of 11 subjects was needed to detect a mean difference of 2 L/min<sup>2</sup> with a standard deviation of paired difference 1.8 L/min (PASS 14, NCSS, LLC, Utah, USA). This conservative standard deviation was chosen because of the expected high variability of the fraction of delivered oxygen between patients with rapid breathing patterns and on low-flow oxygen therapy and between oxygen delivery systems<sup>3,4</sup>. Because  $\text{SpO}_2$  may inaccurately reflect  $\text{SaO}_2$  and therefore interfere with our

design, patients were retrospectively excluded from the analysis if the mismatch between both SpO<sub>2</sub> and SaO<sub>2</sub> measurements exceeded the expected error of 4%<sup>5,6</sup>.

Normality of data was verified with Shapiro-Wilk tests. Data are presented as mean  $\pm$  standard deviation or median and interquartile range (IQR) as appropriate. Paired t-test and Wilcoxon test was applied for pairwise comparisons, as appropriate. Ordinal paired data were compared using the Wilcoxon test. Post-hoc analysis for correlations were calculated by Spearman's rho coefficient. All tests were two-sided and p-values  $\leq 0.05$  were considered significant. Statistical analyses were performed using SPSS version 25 (IBM, Armonk, New York).

## **Results**

The patients rated the standard oxygen delivery system as more comfortable than the DTM and preferred the former over the latter (median difference, 1 [95% CI 0 to 3]; p=0.016). However, there was no significant difference in the inconvenience generated by each system (p=0.13) (e-Table 3). Post-hoc analysis indicated that there was a negative association between oxygen flow at onset and a greater preference for the standard oxygen delivery system (rho = -0.75 [95% CI, -0.93 to -0.25], p=0.008) and a trend towards a negative correlation between baseline oxygen flow and greater comfort rating with the standard oxygen delivery system (rho = -0.57 [95% CI, -0.88 to 0.07], p=0.07), indicating that the DTM was more easily tolerated by patients receiving high oxygen flows (e-Fig 2).

## **References**

1. Simpson S, Kay FU, Abbara S, Bhalla S, Chung JH, Chung M, et al. Radiological Society of North America Expert Consensus Statement on Reporting Chest CT Findings Related to COVID-19. Endorsed by the Society of Thoracic Radiology, the American College of Radiology, and RSNA. *Radiology: Cardiothoracic Imaging*. 2020;**2**:e200152. DOI 10.1148/ryct.2020200152.
2. Duprez F, Cocu S, Legrand A, Brimioulle S, Mashayekhi S, Bodur G, et al. Improvement of arterial oxygenation using the double trunk mask above low flow nasal cannula: a pilot study. *J Clin Monit Comput*. 2020. DOI 10.1007/s10877-020-00485-z.
3. Duprez F, Mashayekhi S, Cuvelier G, Legrand A, Reyckler G. A New Formula for Predicting the Fraction of Delivered Oxygen During Low-Flow Oxygen Therapy. *Respir Care*. 2018;**63**:1528-34. DOI 10.4187/respcare.06243.
4. Katz I, Chen J, Duong K, Zhu K, Pichelin M, Caillibotte G, et al. Dose variability of supplemental oxygen therapy with open patient interfaces based on in vitro measurements using a physiologically realistic upper airway model. *Respir Res*. 2019;**20**:149. DOI 10.1186/s12931-019-1104-0.
5. Nitzan M, Romem A, Koppel R. Pulse oximetry: fundamentals and technology update. *Med Devices (Auckl)*. 2014;**7**:231-9. DOI 10.2147/meder.S47319.
6. Van de Louw A, Cracco C, Cerf C, Harf A, Duvaldestin P, Lemaire F, et al. Accuracy of pulse oximetry in the intensive care unit. *Intensive Care Med*. 2001;**27**:1606-13. DOI 10.1007/s001340101064.

## **e-Figures**

### **e-Figure 1. Illustration of the Double-Trunk Mask.**

The double-trunk mask consists of a regular aerosol mask with two corrugated tubes inserted in the lateral hole of the mask. The double-trunk mask is placed above the nasal cannula where the oxygen is delivered.

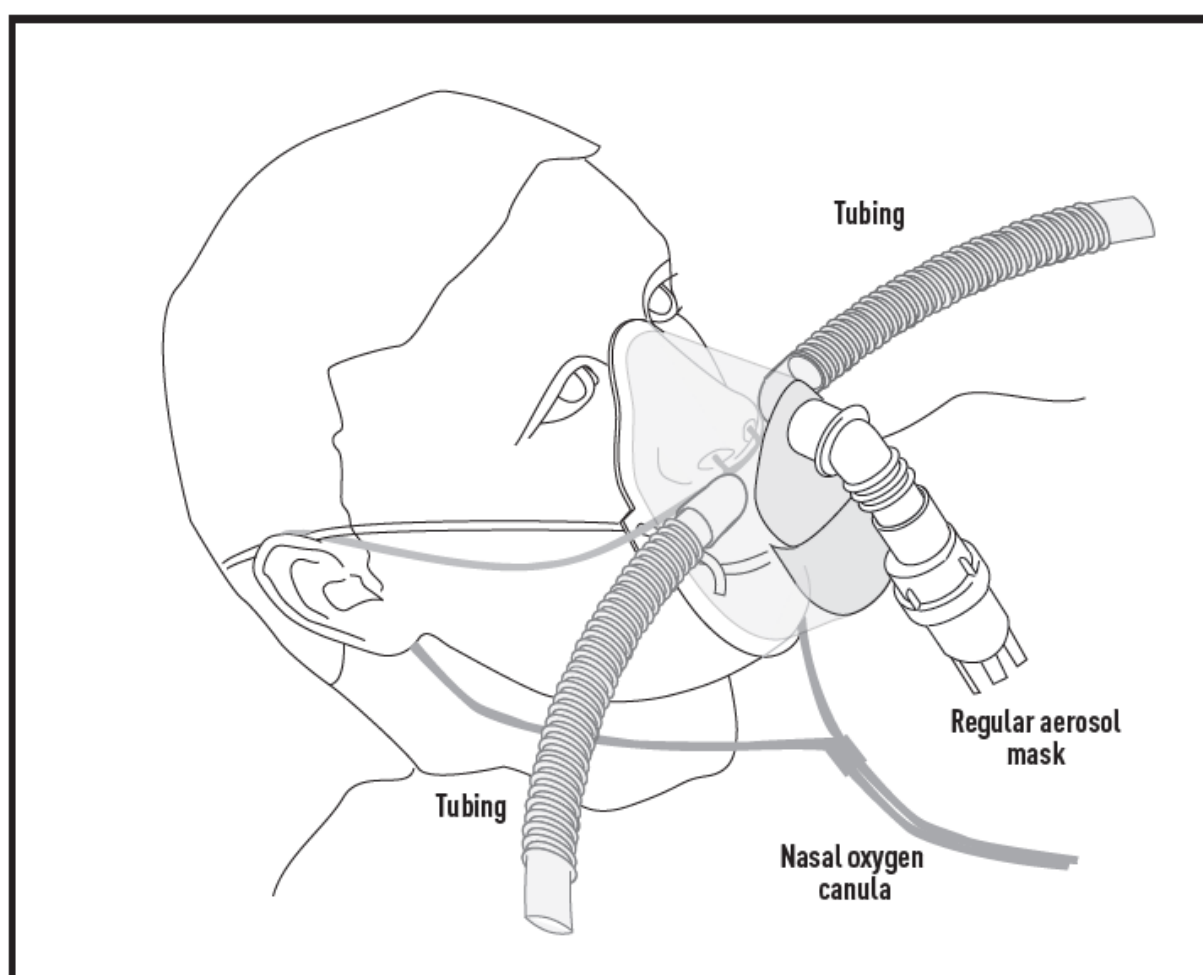

**e-Figure 2. Correlation between baseline oxygen flow and the difference of preference between each oxygen delivery system.**

Positive values indicate that participants preferred the standard oxygen delivery method over the double-trunk mask. Negative values indicate preference for the double-trunk mask over the standard oxygen delivery method.

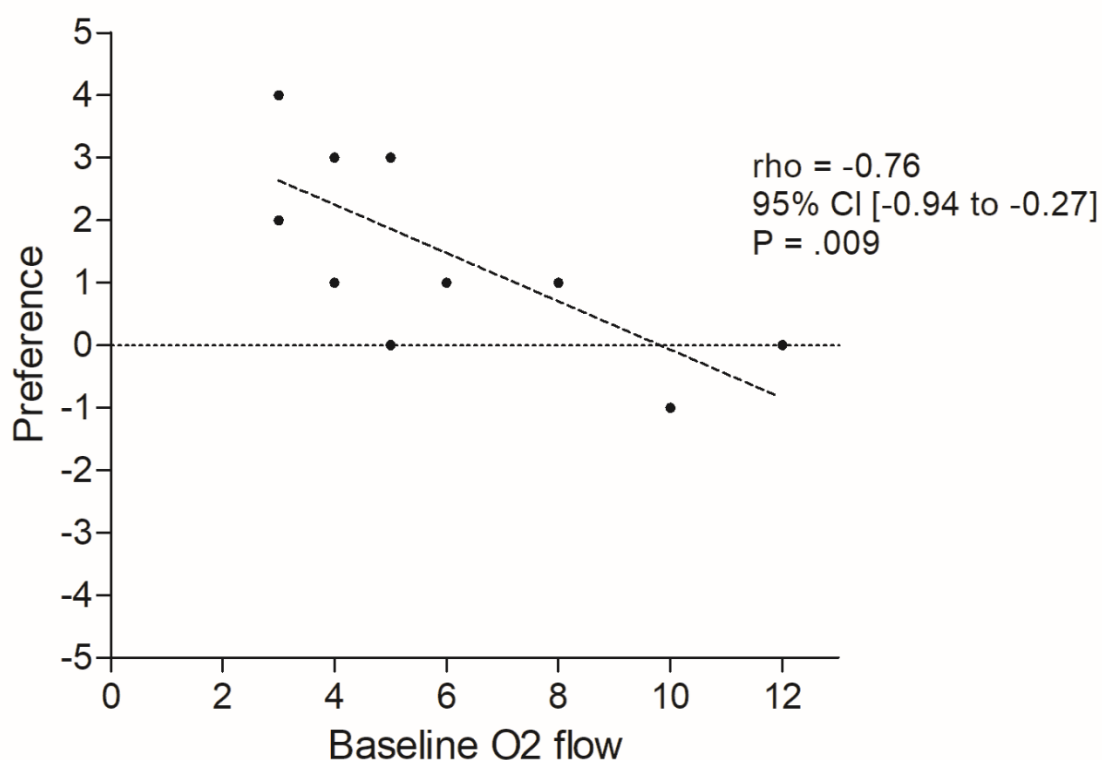

**e-Tables**

e-Table 1: Baseline characteristics

| Variables                                                            | n=11           |
|----------------------------------------------------------------------|----------------|
| Age, mean (SD), years                                                | 61 (14)        |
| Sex, No. (%)                                                         |                |
| Male                                                                 | 8 (73)         |
| Female                                                               | 3 (27)         |
| BMI, mean (SD), kg/m <sup>2</sup>                                    | 28.5 (4.0)     |
| Oxygen flow, median (IQR), L/min                                     | 5 (4-8)        |
| Oxygen delivery system, No. (%)                                      |                |
| Nasal cannula                                                        | 8 (73)         |
| Oronasal mask                                                        | 2 (18)         |
| Non-rebreathing mask <sup>a</sup>                                    | 1 (9)          |
| CT, severity of lesions, No. (%)                                     |                |
| Mild (< 10%)                                                         | 0 (0)          |
| Moderate (10-25%)                                                    | 5 (45)         |
| Extensive (25-50%)                                                   | 2 (18)         |
| Severe (50-75%)                                                      | 4 (36)         |
| Critical (> 75%)                                                     | 0 (0)          |
| Interval between the study and CT, median (IQR), days                | 6 (2-18)       |
| Interval between the study and onset of symptoms, median (IQR), days | 10 (6-25)      |
| CRP level at hospital admission, mean (SD), mg/L                     | 112.49 (64.66) |
| CRP level the study day, mean (SD), mg/L                             | 107.33 (72.27) |
| Setting, No (%)                                                      |                |
| Intensive care unit                                                  | 1 (9)          |
| Medical wards                                                        | 10 (91)        |

List of abbreviations: BMI, body mass index; CRP, C-reactive protein; CT, computed tomography.

<sup>a</sup> One of the two one-way valves on the front of the mask was withdrawn.

e-Table 2: Clinical outcomes at any time point of the study.

| Outcomes                                        | T <sub>0</sub><br>(Standard system) | T <sub>30</sub><br>(Double-trunk mask) | T <sub>60</sub><br>(Standard system) | Mean or Median change between time points, 95% CI, p-value                 |                                                                                |
|-------------------------------------------------|-------------------------------------|----------------------------------------|--------------------------------------|----------------------------------------------------------------------------|--------------------------------------------------------------------------------|
|                                                 |                                     |                                        |                                      | Change between Pre-Post<br>intervention (T <sub>30</sub> -T <sub>0</sub> ) | Change between Baseline and<br>End of study (T <sub>60</sub> -T <sub>0</sub> ) |
| Oxygen output, median<br>(IQR), L/min           | 5 (4-8)                             | 1.5 (1.5-4)                            | 4 (3-8)                              | -3 (-4 to -1.5), p=0.003                                                   | 0 (0 to 0), p=0.32                                                             |
| SpO <sub>2</sub> , median (IQR), %              | 94 (94-95)                          | 95 (94-95)                             | 94 (94-95)                           | 0 (0 to 2), p=0.19                                                         | 0 (-1 to 1), p=0.71                                                            |
| SaO <sub>2</sub> , median (IQR), %              | 95.5 (94.2-97.1)                    | 95.7 (94.2-97.3)                       | /                                    | 0.2 (-0.6 to 1.5), p=0.24                                                  | n/a                                                                            |
| PaO <sub>2</sub> , median (IQR), mmHg           | 76 (65-82)                          | 75 (69-86)                             | /                                    | 2 (-2 to 15), p=0.23                                                       | n/a                                                                            |
| PaCO <sub>2</sub> , median (IQR), mmHg          | 36 (34-39)                          | 37 (35-41)                             | /                                    | 1 (0 to 2), p=0.006                                                        | n/a                                                                            |
| pH, median (IQR)                                | 7.48 (7.45-7.49)                    | 7.45 (7.44-7.48)                       | /                                    | -0.02 (-0.02 to 0), p=0.009                                                | n/a                                                                            |
| Temperature, mean (SD), °C                      | 36.6 (0.55)                         | 36.6 (0.58)                            | 36.5 (0.55)                          | 0.0 (-0.1 to 0.2), p=0.60                                                  | -0.1 (-0.3 to 0.1), p=0.31                                                     |
| Heart rate, mean (SD),<br>beats/min             | 88.6 (17.9)                         | 88.6 (17.3)                            | 87.3 (17.2)                          | 0.0 (-2.0 to 2.0), p>0.99                                                  | -1.3 (-3.5 to 0.9), p=0.23                                                     |
| Systolic blood pressure,<br>median (IQR), mmHg  | 130 (120-143)                       | 120 (110-143)                          | 121 (110-135)                        | 1 (-10 to 10), p=0.53                                                      | 0 (-20 to 8), p=0.17                                                           |
| Diastolic blood pressure,<br>median (IQR), mmHg | 78 (70-83)                          | 72 (70-83)                             | 73 (70-80)                           | 0 (-5 to 10), p=0.40                                                       | 0 (-10 to 0), p=0.11                                                           |
| Respiratory rate, mean (SD),<br>breaths/min     | 26 (4)                              | 30 (7)                                 | 27 (5)                               | 3 (0 to 7), p=0.054                                                        | 1 (-1 to 3), p=0.45                                                            |

List of abbreviations: SpO<sub>2</sub>, pulse oxygen saturation; SaO<sub>2</sub>, arterial oxygen saturation; PaO<sub>2</sub>, arterial oxygen tension; PaCO<sub>2</sub>, arterial carbon dioxide tension. T<sub>0</sub>, baseline; T<sub>30</sub>, 30 minutes after baseline, the double-trunk mask being worn 30 minutes; T<sub>60</sub>, 60 minutes after baseline, the standard oxygen delivery system being worn 30 minutes between T<sub>30</sub> and T<sub>60</sub>.

e-Table 3. Comfort questions

| Comfort questions, using scale 1-5*                                                | Double-trunk mask | Standard system | p-value |
|------------------------------------------------------------------------------------|-------------------|-----------------|---------|
| Q1. Is the oxygen delivery system comfortable?                                     | 3 (2-4)           | 5 (4-5)         | 0.016   |
| Q2. Is the oxygen delivery system more comfortable than the previous one?          | 3 (2-4)           | 5 (4-5)         | 0.016   |
| Q3. Is the oxygen delivering system inconvenient leading to a risk of its removal? | 4 (1-4)           | 1 (1-3)         | 0.13    |

Results are displayed as median (IQR)

\* Comfort questions were assessed using 1-5 Likert scale. 1: strongly disagree, 2: disagree, 3: neutral, 4: agree, 5: strongly agree.
